# Supplementary material for: Prospective associations of age at complementary feeding and exclusive breastfeeding duration with body mass index at 5–6 years within different risk groups
Source: PubMed Central journal article supplement — Pediatr Obes. 2018 Apr 25;13(8):522–9. doi: 10.1111/ijpo.12289 (PMC6099412; doi:10.1111/ijpo.12289), 2018-04-25
Supplement: IJPO-13-522-s001.pdf [file IJPO-13-522-s001.pdf]

# **Prospective associations of age at complementary feeding and exclusive breastfeeding duration with relative weight at 5 - 6 years within different risk groups**

**Outi Sirkka<sup>1,2</sup>, Tanja Vrijkotte<sup>3</sup>, Jutka Halberstadt<sup>1</sup>, Marieke Abrahamse-Berkeveld<sup>2</sup>, Trynke Hoekstra<sup>1</sup>, Jacob Seidell<sup>1</sup>, Margreet Olthof<sup>1</sup>**

*<sup>1</sup>Department of Health Sciences, Faculty of Science, Vrije Universiteit Amsterdam, Amsterdam Public Health Research Institute, Amsterdam, The Netherlands. <sup>2</sup>Nutricia Research, Utrecht, the Netherlands. <sup>3</sup>Department of Public Health, Academic Medical Centre, Amsterdam Public Health Research Institute, University of Amsterdam, Amsterdam, the Netherlands*

## **Corresponding author:**

Outi Sirkka, MSc

Vrije Universiteit Amsterdam, Faculty of Science, Department of Health Sciences

De Boelelaan 1085, 1081 HV Amsterdam, the Netherlands

Tel: +31 (0)6 248 35 027

Fax: +31 (0)20 59 86 940

## Supporting information

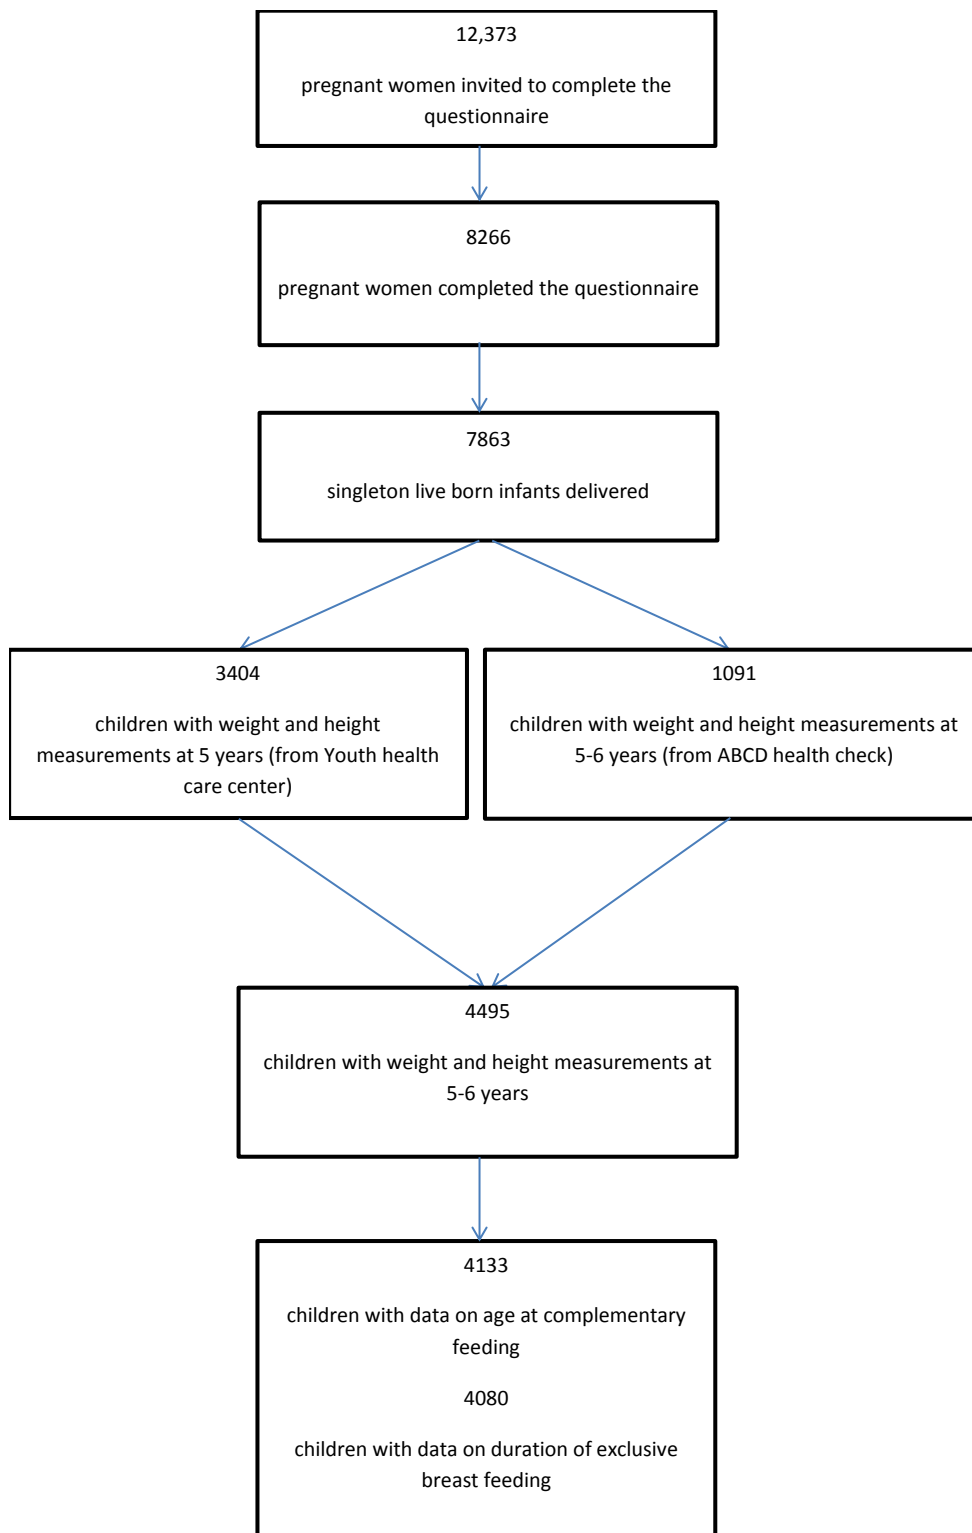

**Figure S1. Selection of the study population**

**Table S1. Risk groups by age at complementary feeding (n =4133) and duration of exclusive breastfeeding (n =4080)**

|                                                | Age at complementary feeding |                        | Duration of exclusive breastfeeding |                            |                       |
|------------------------------------------------|------------------------------|------------------------|-------------------------------------|----------------------------|-----------------------|
|                                                | < 5 months<br>(n=1094)       | ≥ 5 months<br>(n=3039) | < 3 months<br>(n=2223)              | 3 - 5.9 months<br>(n=1321) | ≥ 6 months<br>(n=536) |
| <b>Ethnicity % (N)<sup>1</sup></b>             |                              |                        |                                     |                            |                       |
| Dutch                                          | 26.8<br>(652)                | 73.2<br>(1783)         | 51.3<br>(1237)                      | 35.3<br>(851)              | 13.4<br>(323)         |
| Turkish                                        | 20.6<br>(43)                 | 79.4<br>(166)          | 52.7<br>(109)                       | 33.8<br>(70)               | 13.5<br>(28)          |
| Moroccan                                       | 23.9<br>(80)                 | 76.1<br>(255)          | 63.5<br>(207)                       | 21.8<br>(71)               | 14.7<br>(48)          |
| Surinamese                                     | 34.6<br>(90)                 | 65.4<br>(170)          | 78.6<br>(202)                       | 14.8<br>(38)               | 6.6<br>(17)           |
| <b>Education level<br/>% (N)<sup>2</sup></b>   |                              |                        |                                     |                            |                       |
| Low                                            | 30.1<br>(241)                | 69.9<br>(559)          | 68.0<br>(534)                       | 20.0<br>(157)              | 12.0<br>(94)          |
| Medium                                         | 29.4<br>(443)                | 70.6<br>(1065)         | 58.6<br>(874)                       | 29.5<br>(440)              | 11.9<br>(177)         |
| High                                           | 22.6<br>(405)                | 77.4<br>(1389)         | 45.0<br>(798)                       | 40.4<br>(716)              | 14.6<br>(259)         |
| <b>Pre-pregnancy BMI<br/>% (N)<sup>2</sup></b> |                              |                        |                                     |                            |                       |
| Normal                                         | 25.3<br>(797)                | 74.7<br>(2347)         | 52.5<br>(1628)                      | 34.4<br>(1066)             | 13.2<br>(408)         |
| Overweight                                     | 28.7<br>(200)                | 71.3<br>(496)          | 58.8<br>(405)                       | 27.1<br>(187)              | 14.1<br>(97)          |
| Obese                                          | 33.3<br>(94)                 | 66.7<br>(188)          | 65.8<br>(183)                       | 23.7<br>(66)               | 10.4<br>(29)          |
| <b>Neighbourhood<br/>% (N)<sup>2</sup></b>     |                              |                        |                                     |                            |                       |
| Low risk                                       | 21.0<br>(234)                | 79.0<br>(878)          | 46.8<br>(513)                       | 39.3<br>(431)              | 13.9<br>(152)         |
| Medium risk                                    | 26.9<br>(492)                | 73.1<br>(1336)         | 55.4<br>(1003)                      | 31.4<br>(569)              | 13.1<br>(238)         |
| High risk                                      | 30.9<br>(368)                | 69.1<br>(822)          | 60.3<br>(707)                       | 27.2<br>(319)              | 12.5<br>(146)         |

<sup>1</sup>Total N=3601 due to exclusion of ‘‘other’’ ethnicities (n=894 for age at complementary feeding, n=879 exclusive breast feeding). <sup>2</sup>Missing data per risk group: education level n=31 (0.7 %), pre-pregnancy BMI n=11 (0.3 %), neighbourhood n=3 (0.1 %).

**Table SII. Associations between age at complementary feeding and BMI-SDS at age 5-6 years by risk groups, linear regression, adjusted models**

|                                      | <b>Model 2</b> |                       | <b>Model 35</b> |                       |
|--------------------------------------|----------------|-----------------------|-----------------|-----------------------|
|                                      | <b>B</b>       | <b>(95% CI)</b>       | <b>B</b>        | <b>(95% CI)</b>       |
| <b>All</b>                           | <b>-0.09*</b>  | <b>(-0.16, -0.02)</b> | <b>-0.10**</b>  | <b>(-0.17, -0.02)</b> |
| <b>Ethnicity<sup>1</sup></b>         |                |                       |                 |                       |
| Dutch                                | <b>-0.10*</b>  | <b>(-0.18, -0.02)</b> | <b>-0.10*</b>   | <b>(-0.18, -0.02)</b> |
| Turkish                              | 0.00           | (-0.44, 0.44)         | 0.07            | (-0.35, 0.49)         |
| Moroccan                             | -0.13          | (-0.40, 0.15)         | -0.14           | (-0.43, 0.15)         |
| Surinamese                           | -0.04          | (-0.34, 0.26)         | -0.00           | (-0.30, 0.29)         |
| <b>Education level<sup>2</sup></b>   |                |                       |                 |                       |
| Low                                  | -0.11          | (-0.29, 0.07)         | -0.13           | (-0.32, 0.06)         |
| Medium                               | <b>-0.18**</b> | <b>(-0.29, -0.07)</b> | <b>-0.17**</b>  | <b>(-0.28, -0.05)</b> |
| High                                 | -0.01          | (-0.09, 0.10)         | 0.04            | (-0.06, 0.13)         |
| <b>Pre-pregnancy BMI<sup>3</sup></b> |                |                       |                 |                       |
| Normal                               | <b>-0.09*</b>  | <b>(-0.16, -0.01)</b> | -0.07           | (-0.15, 0.01)         |
| Overweight                           | <b>-0.18*</b>  | <b>(-0.35, -0.01)</b> | -0.17           | (-0.35, 0.01)         |
| Obese                                | -0.06          | (-0.26, 0.37)         | 0.06            | (-0.26, 0.38)         |
| <b>Neighbourhood<sup>4</sup></b>     |                |                       |                 |                       |
| Low risk                             | -0.08          | (-0.20, 0.08)         | -0.04           | (-0.16, 0.09)         |
| Medium risk                          | -0.05          | (-0.16, 0.08)         | -0.06           | (-0.17, 0.05)         |
| High risk                            | <b>-0.15*</b>  | <b>(-0.32, -0.02)</b> | <b>-0.16*</b>   | <b>(-0.30, -0.02)</b> |

<sup>1</sup>Model 2 is adjusted for education level, pre-pregnancy BMI and neighborhood.

<sup>2</sup> Model 2 is adjusted for ethnicity, pre-pregnancy BMI and neighborhood.

<sup>3</sup> Model 2 is adjusted for ethnicity, education level and neighborhood.

<sup>4</sup> Model 2 is adjusted for ethnicity level, education level and pre-pregnancy BMI.

<sup>5</sup> Model 3 is adjusted for birth weight and duration of any breastfeeding (instead of model 2 covariates).

\*p<0.05, \*\*p<0.01

**Table SIII. Associations between duration of exclusive breastfeeding and BMI-SDS at age 5-6 years by risk groups, linear regression, adjusted models**

|                                      | Model 2                      |                                  | Model 3 <sup>5</sup>            |                                   |
|--------------------------------------|------------------------------|----------------------------------|---------------------------------|-----------------------------------|
|                                      | 3 - 5.9 months<br>B (95% CI) | ≥ 6 months<br>B (95% CI)         | 3 - 5.9 months<br>B (95% CI)    | ≥ 6 months<br>B (95% CI)          |
| <b>All</b>                           | -0.00<br>(-0.06, 0.07)       | <b>-0.16**</b><br>(-0.25, -0.06) | <b>-0.07*</b><br>(-0.14, -0.01) | <b>-0.21***</b><br>(-0.30, -0.11) |
| <b>Ethnicity<sup>1</sup></b>         |                              |                                  |                                 |                                   |
| Dutch                                | -0.02<br>(-0.10, 0.06)       | -0.10<br>(-0.20, 0.02)           | -0.06<br>(-0.14, 0.02)          | <b>-0.15**</b><br>(-0.25, -0.04)  |
| Turkish                              | 0.01<br>(-0.37, 0.40)        | -0.14<br>(-0.68, 0.41)           | 0.01<br>(-0.37, 0.39)           | -0.07<br>(-0.59, 0.45)            |
| Moroccan                             | 0.09<br>(-0.21, 0.39)        | -0.25<br>(-0.61, 0.10)           | 0.14<br>(-0.16, 0.44)           | -0.25<br>(-0.60, 0.10)            |
| Surinamese                           | 0.04<br>(-0.38, 0.46)        | -0.41<br>(-0.99, 0.17)           | -0.14<br>(-0.54, 0.26)          | -0.39<br>(-0.96, 0.19)            |
| <b>Education level<sup>2</sup></b>   |                              |                                  |                                 |                                   |
| Low                                  | 0.09<br>(-0.12, 0.30)        | <b>-0.27*</b><br>(-0.53, -0.01)  | 0.07<br>(-0.14, 0.28)           | <b>-0.32*</b><br>(-0.58, -0.06)   |
| Medium                               | -0.05<br>(-0.16, 0.07)       | <b>-0.24**</b><br>(-0.40, -0.08) | -0.07<br>(-0.19, 0.05)          | <b>-0.30***</b><br>(-0.46, -0.14) |
| High                                 | 0.03<br>(-0.06, 0.11)        | -0.04<br>(-0.16, 0.09)           | 0.03<br>(-0.06, 0.11)           | -0.04<br>(-0.16, 0.09)            |
| <b>Pre-pregnancy BMI<sup>3</sup></b> |                              |                                  |                                 |                                   |
| Normal                               | -0.03<br>(-0.10, 0.05)       | <b>-0.17**</b><br>(-0.27, -0.07) | -0.06<br>(-0.13, 0.01)          | <b>-0.20***</b><br>(-0.30, -0.10) |
| Overweight                           | <b>0.20*</b><br>(0.01, 0.38) | -0.11<br>(-0.35, 0.13)           | 0.12<br>(-0.07, 0.30)           | -0.20<br>(-0.43, 0.04)            |
| Obese                                | -0.06<br>(-0.43, 0.31)       | -0.04<br>(-0.55, 0.47)           | -0.06<br>(-0.41, 0.28)          | -0.03<br>(-0.51, 0.46)            |
| <b>Neighbourhood<sup>4</sup></b>     |                              |                                  |                                 |                                   |
| Low risk                             | -0.02<br>(-0.13, 0.09)       | -0.13<br>(-0.28, 0.03)           | -0.02<br>(-0.13, 0.09)          | -0.13<br>(-0.28, 0.02)            |
| Medium risk                          | -0.02<br>(-0.09, 0.12)       | -0.11<br>(-0.25, 0.03)           | -0.09<br>(-0.20, 0.01)          | <b>-0.20**</b><br>(-0.34, -0.06)  |
| High risk                            | 0.03<br>(-0.11, 0.18)        | <b>-0.22*</b><br>(-0.42, -0.03)  | -0.05<br>(-0.20, 0.10)          | <b>-0.27*</b><br>(-0.46, -0.07)   |

<sup>1</sup>Model 2 is adjusted for education level, pre-pregnancy BMI and neighborhood.

<sup>2</sup>Model 2 is adjusted for ethnicity, pre-pregnancy BMI and neighborhood.

<sup>3</sup>Model 2 is adjusted for ethnicity, education level and neighborhood.

<sup>4</sup>Model 2 is adjusted for ethnicity level, education level and pre-pregnancy BMI.

<sup>5</sup>Model 3 is adjusted for birth weight (instead of model 2 covariates).

\*p<0.05, \*\*p<0.01, \*\*\*p<0.001
